# Supplementary material for: Surface double coating of a LiNiaCobAl1−a−bO2(a> 0.85) cathode with TiOxand Li2CO3to apply a water-based hybrid polymer binder to Li-ion batteries
Source: Royal Society of Chemistry journal article supplement (doi:10.1039/d0ra00197j), 2020-01-01
Supplement: d0ra00197j1.pdf [file d0ra00197j1.pdf]

# Supporting information

**Surface Double Coating of  $\text{LiNi}_a\text{Co}_b\text{Al}_{1-a-b}\text{O}_2$  ( $a > 0.85$ )  
Cathode with  $\text{TiO}_x$  and  $\text{Li}_2\text{CO}_3$  to Apply a Water-Based  
Hybrid Polymer Binder to Li-Ion Batteries' Preparation**

Tatsuya Watanabe <sup>a</sup>, Kouji Hirai <sup>a</sup>, Fuma Ando <sup>a</sup>, Shoudai Kurosumi <sup>b</sup>, Shinsaku Ugawa <sup>b</sup>,  
Hojin Lee <sup>b</sup>, Yuta Irii <sup>c</sup>, Fumihiko Maki <sup>c</sup>, Takao Gunji <sup>a</sup>, Jianfei Wu <sup>d</sup>,  
Takao Ohsaka <sup>e</sup>, Futoshi Matsumoto <sup>a</sup>

<sup>a</sup>Department of Materials and Life Chemistry, Kanagawa University, 3-27-1,  
Rokkakubashi, Kanagawa-ku, Yokohama, Kanagawa 221-8686, Japan

<sup>b</sup>JSR Corporation, 100 Kawajiri-cho, Yokkaichi, Mie 510-8552, Japan

<sup>c</sup>Nihon Kagaku Sangyo Co., Ltd., 1-28-13 Nakane, Soka, Saitama 340-0005, Japan

<sup>d</sup>Qingdao Industrial Energy Storage Research Institute, Qingdao Institute of Bioenergy  
and Bioprocess Technology, Chinese Academy of Sciences, No. 189  
Songling Road, 266101 Qingdao, China

<sup>e</sup>Research Institute for Engineering, Kanagawa University,  
3-27-1, Rokkakubashi, Kanagawa-ku, Yokohama, Kanagawa 221-8686, Japan

## **Experimental**

### **Equipments and measurement conditions of TEM, STEM, STEM-EELS and STEM-EDX.**

A 200 kV transmission electron microscope (TEM and/or STEM, JEM-2100F, JEOL) equipped with two aberration correctors (CEOS GmbH) for the image- and probe-forming lens systems and an X-ray energy-dispersive spectrometer (EDX, JED-2300T, JEOL) were used for compositional analysis of the particle surfaces. Both aberration correctors were optimized to realize the point-to-point resolutions of TEM and scanning transmission electron microscopy (STEM) as 1.3 and 1.1 Å, respectively. The distribution of Li, O, C, Ni and Ti atoms on the coated- NCA samples was evaluated by Cs-corrected STEM analysis with an electron energy-loss spectroscopy (EELS, Gatan, GIF Quantum). In order to find out their distributions, Li-K edge was simultaneously obtained, and O-K, C-K, Ni-L, and Ti-L edges were also obtained at the same area. We mapped the Li distribution by Li K-edge. Linear background subtraction was made in order to purely get the Li K-edge in distinction from Ni K-edge. Power law background subtraction was made in order to get the Ni and Ti L-edges.

### **Thermogravimetry (TG) experiment**

Moisture contents of the cathode electrodes were measured with differential thermoanalyzer (ThermoPlus EVO TG 8120, Rigaku). Tested samples of 44-47 mg were obtained from pristine and  $\text{TiO}_x/\text{Li}_2\text{CO}_3$ -coated NCA cathodes by scratching the cathode surfaces. The scratched powders were heated at the temperature elevation rate of  $10\text{ }^\circ\text{Cmin}^{-1}$  under argon atmosphere. The weight % of water in the cathode was calculated from the difference in weight in the temperature region from 100 to  $200\text{ }^\circ\text{C}$ .

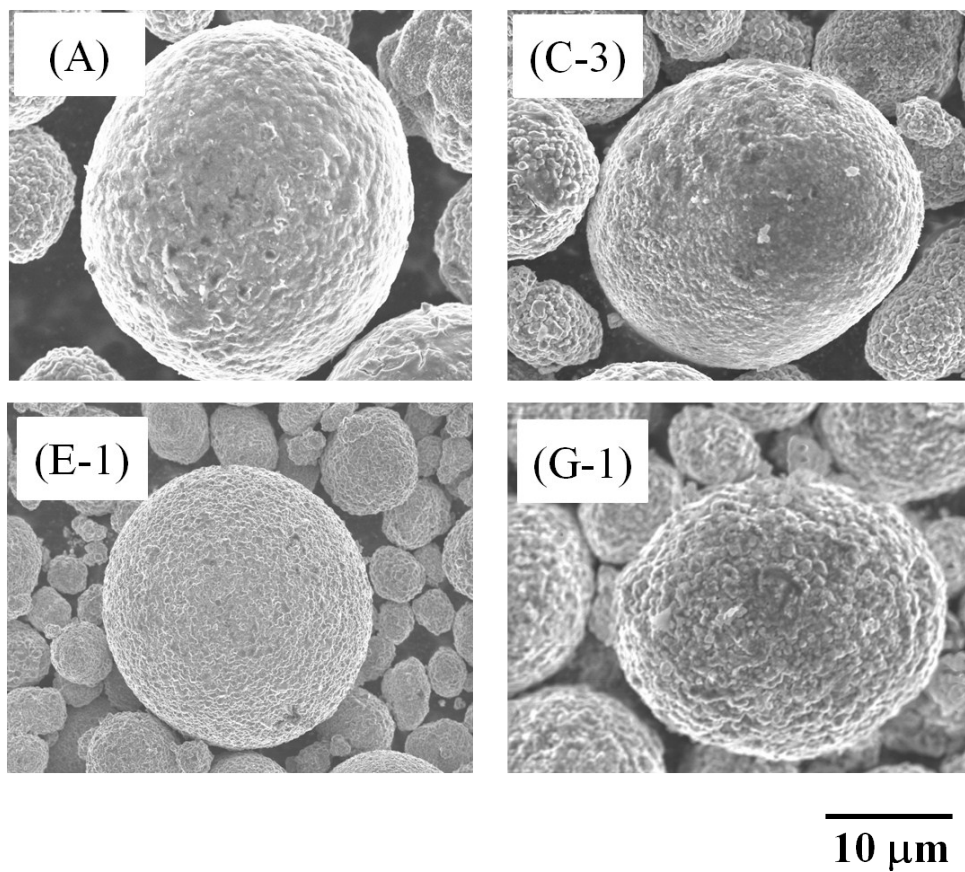

**Fig. S1** SEM images of NCA particles prior to water treatment. (A) pristine (un-coated) NCA, (C-3)  $\text{TiO}_x$ -coated NCA, (E-1)  $\text{Li}_2\text{CO}_3$ -coated NCA and (G-1)  $\text{TiO}_x/\text{Li}_2\text{CO}_3$ -coated NCA.

### Sample C-1

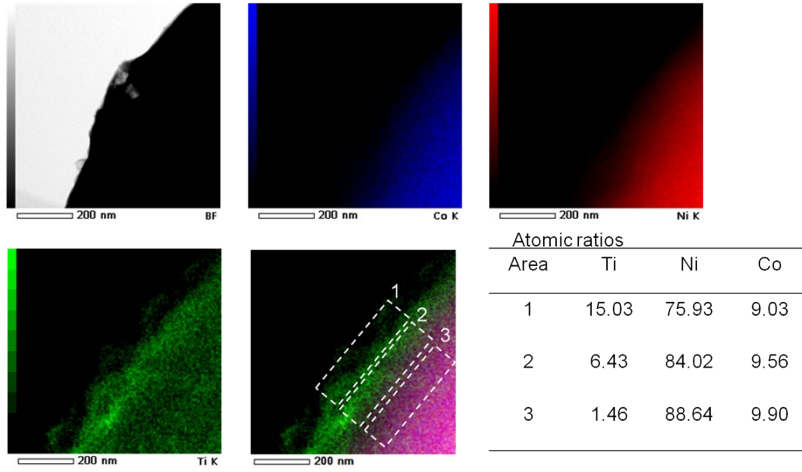

### Sample C-2

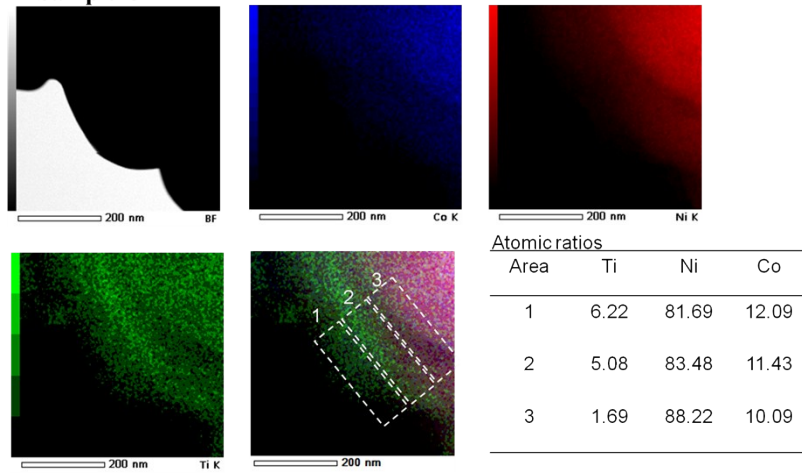

### Sample C-3

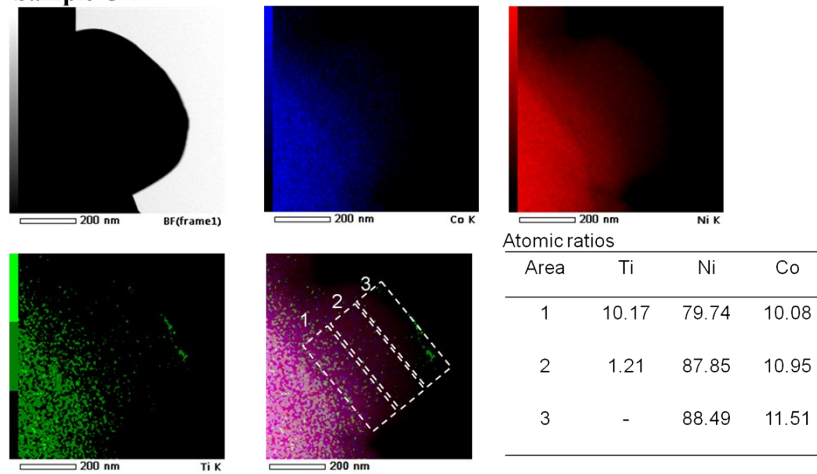

Sample C-4

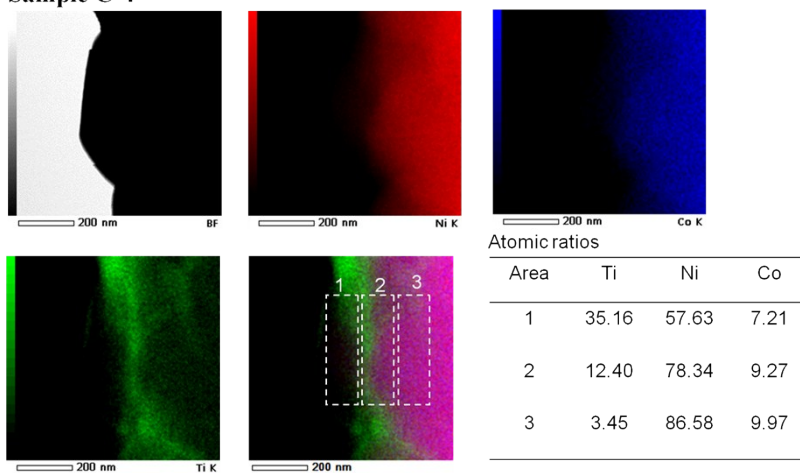

Sample C-5

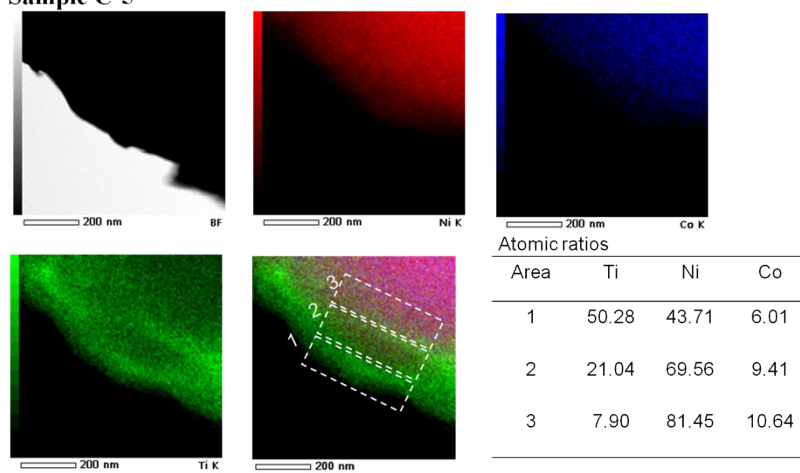

Fig. S2 TEM-EDX mapping of  $\text{TiO}_x$ -coated NCA samples C-1~C-5.

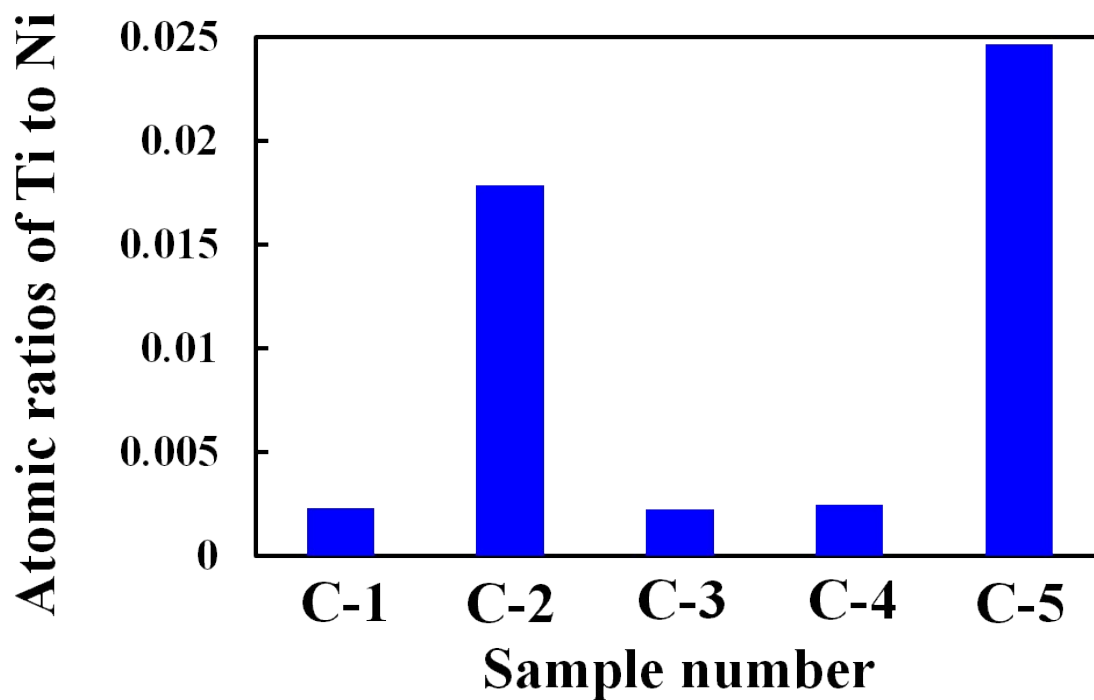

**Fig. S3** Atomic ratios of Ti to Ni in  $\text{TiO}_x$ -coated NCA samples C-1~C-5 estimated from the XRF experiments.

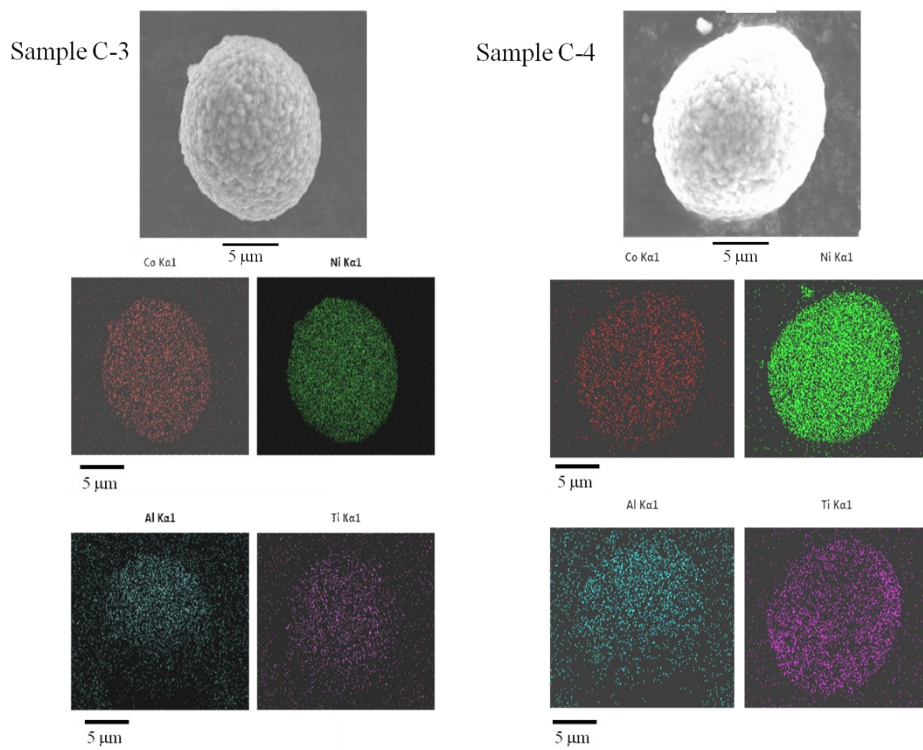

**Fig. S4** SEM-EDX images of  $\text{TiO}_x$ -coated NCA samples C-3 and C-4.



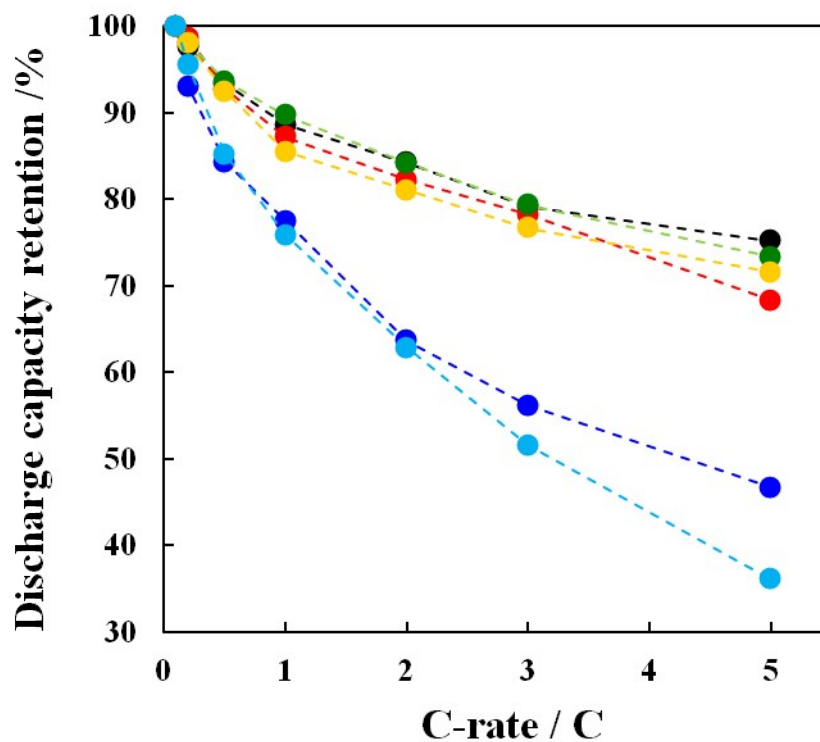

**Fig. S5** Plots of discharge capacity retention vs. C-rate obtained with the cathodes prepared from (●) the slurry consisting of pristine NCA, PVdF and AB, (●, ●, ●, ●, ●) the water-based slurries consisting of  $\text{TiO}_x$ -coated NCA (samples C-1~C-5), TRD202A, CMC and AB at 25°C. In the calculation of the discharge capacity retention, the discharge capacity obtained at 0.1 C with each cathode was considered as 100% of capacity retention. Samples C-1: ●, C-2: ●, C-3: ●, C-4: ●, and C-5: ●.

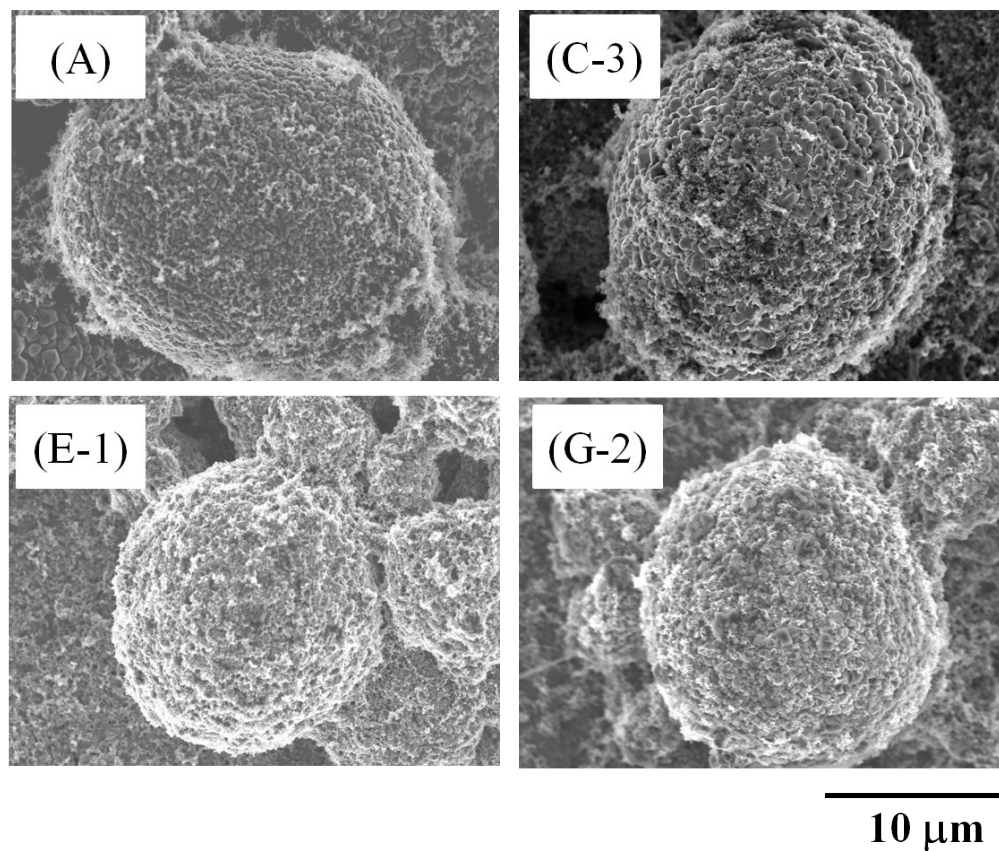

**Fig. S6** SEM images of NCA particles on cathodes after 30 charging/discharging cycles at the charging/discharging rate of 0.1 C at 25 °C. The cathodes were prepared with (A) the NMP slurry consisting of pristine NCA (A), PVdF and AB, (C-3) the water-based slurry consisting of TiO<sub>x</sub>-coated NCA, TRD202A, CMC and AB, (E-1) the water-based slurry consisting of Li<sub>2</sub>CO<sub>3</sub>-coated NCA (the slurry was kept for 1 h under CO<sub>2</sub> atmosphere), TRD202A, CMC and AB, and (G-2) the water-based slurry consisting of TiO<sub>x</sub>/Li<sub>2</sub>CO<sub>3</sub>-coated NCA (the slurry was kept for 7 days under CO<sub>2</sub> atmosphere), TRD202A, CMC and AB.

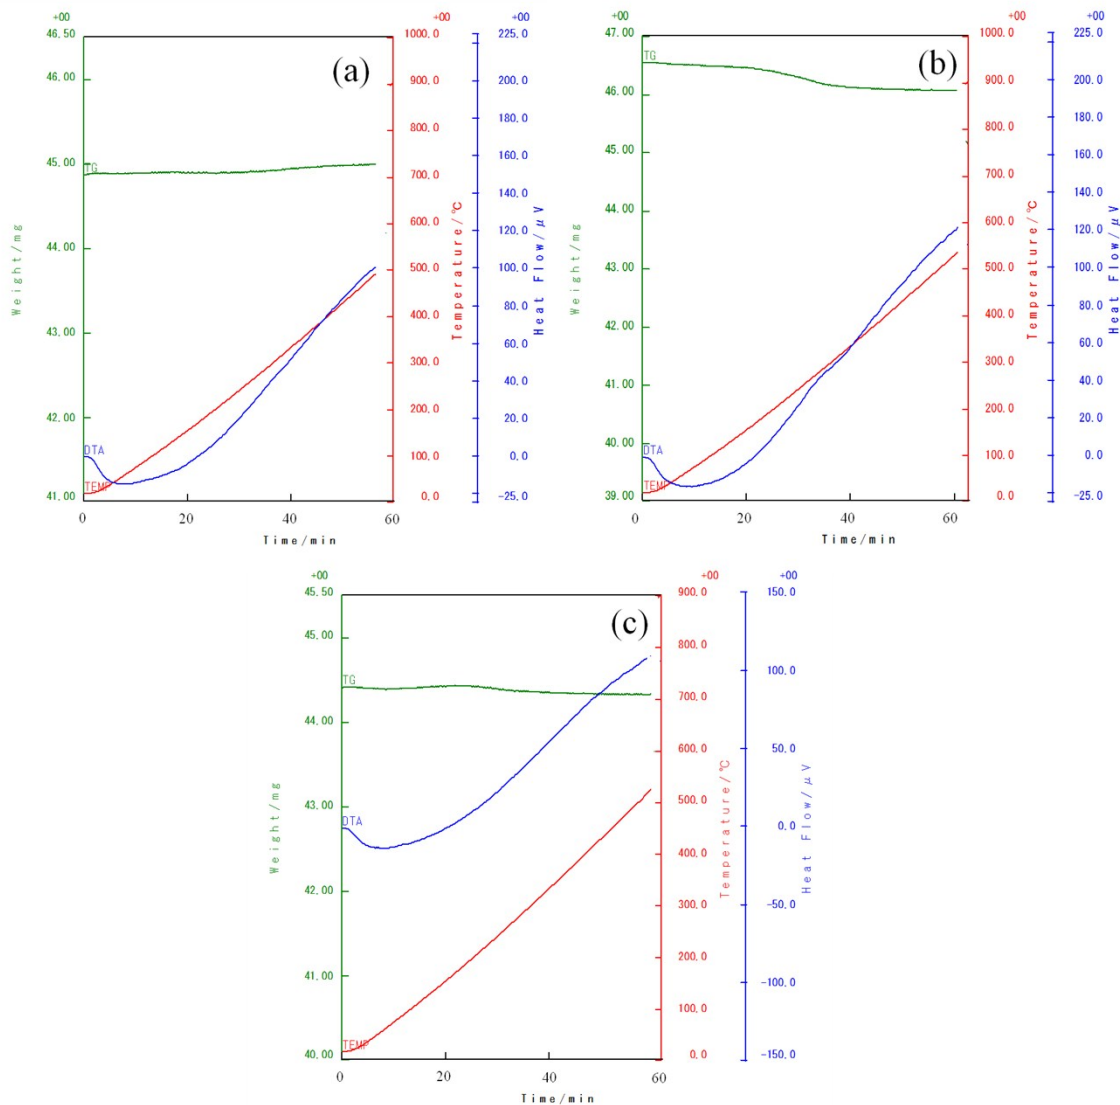

**Fig. S7** The results of TG measurements of the sample powders obtained from the cathodes composed of (a) pristine NCA (A), PVdF and AB and (c) TiO<sub>x</sub>/Li<sub>2</sub>CO<sub>3</sub>-coated NCA (G-2), TRD202A, CMC and AB, and (b) TiO<sub>x</sub>/Li<sub>2</sub>CO<sub>3</sub>-coated NCA (G-2) particles prepared.

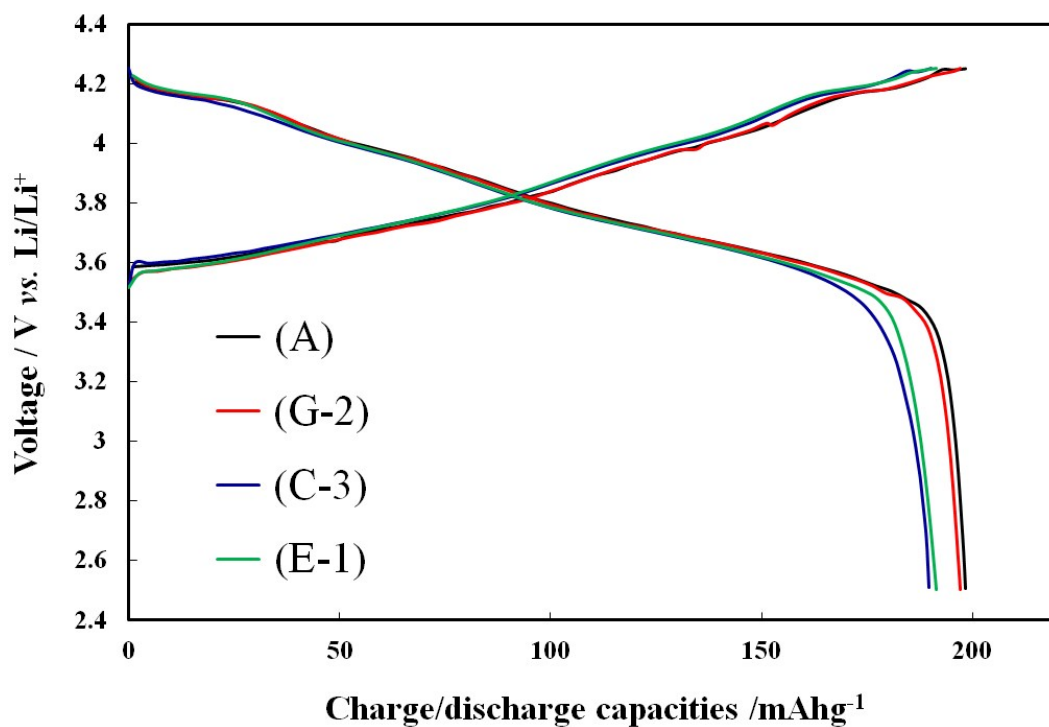

**Fig. S8** Charge/discharge voltage-capacity curves observed at the 10<sup>th</sup> cycle and 0.1 C with the cathodes prepared with pristine (A),  $\text{TiO}_x/\text{Li}_2\text{CO}_3$  (G-2)-,  $\text{TiO}_x$ (C-3)- and  $\text{Li}_2\text{CO}_3$  (E-1)-coated NCA particles.

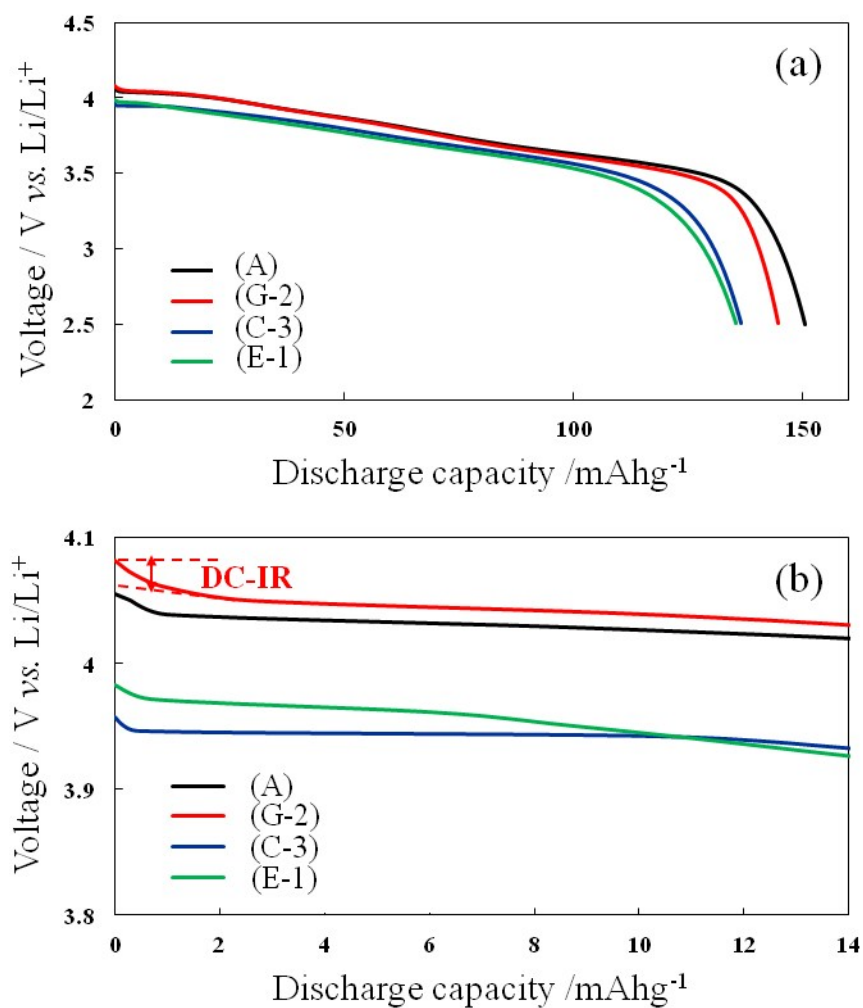

**Fig. S9** (a) Discharge voltage-discharge capacity curves observed at 5 C in the rate performance test of **Fig. 13** with the cathodes prepared with pristine (A), TiO<sub>x</sub>/Li<sub>2</sub>CO<sub>3</sub> (G-2)-, TiO<sub>x</sub>(C-3)- and Li<sub>2</sub>CO<sub>3</sub> (E-1)-coated NCA cathodes. (b) Enlarged discharge voltage-discharge capacity curves to show the DC-IR drop.
